# Supplementary material for: The Role of ATP Synthase Subunit e (ATP5I) in Mediating the Metabolic and Antiproliferative Effects of Biguanides
Source: eLife journal article supplement (doi:10.7554/elife.102680), 2024-12-13
Supplement: fig1-data2 [file Figure 1B_Source data 2.pdf › Figure 1 - Source data 2/Figure 1B_Source data 2.pdf]

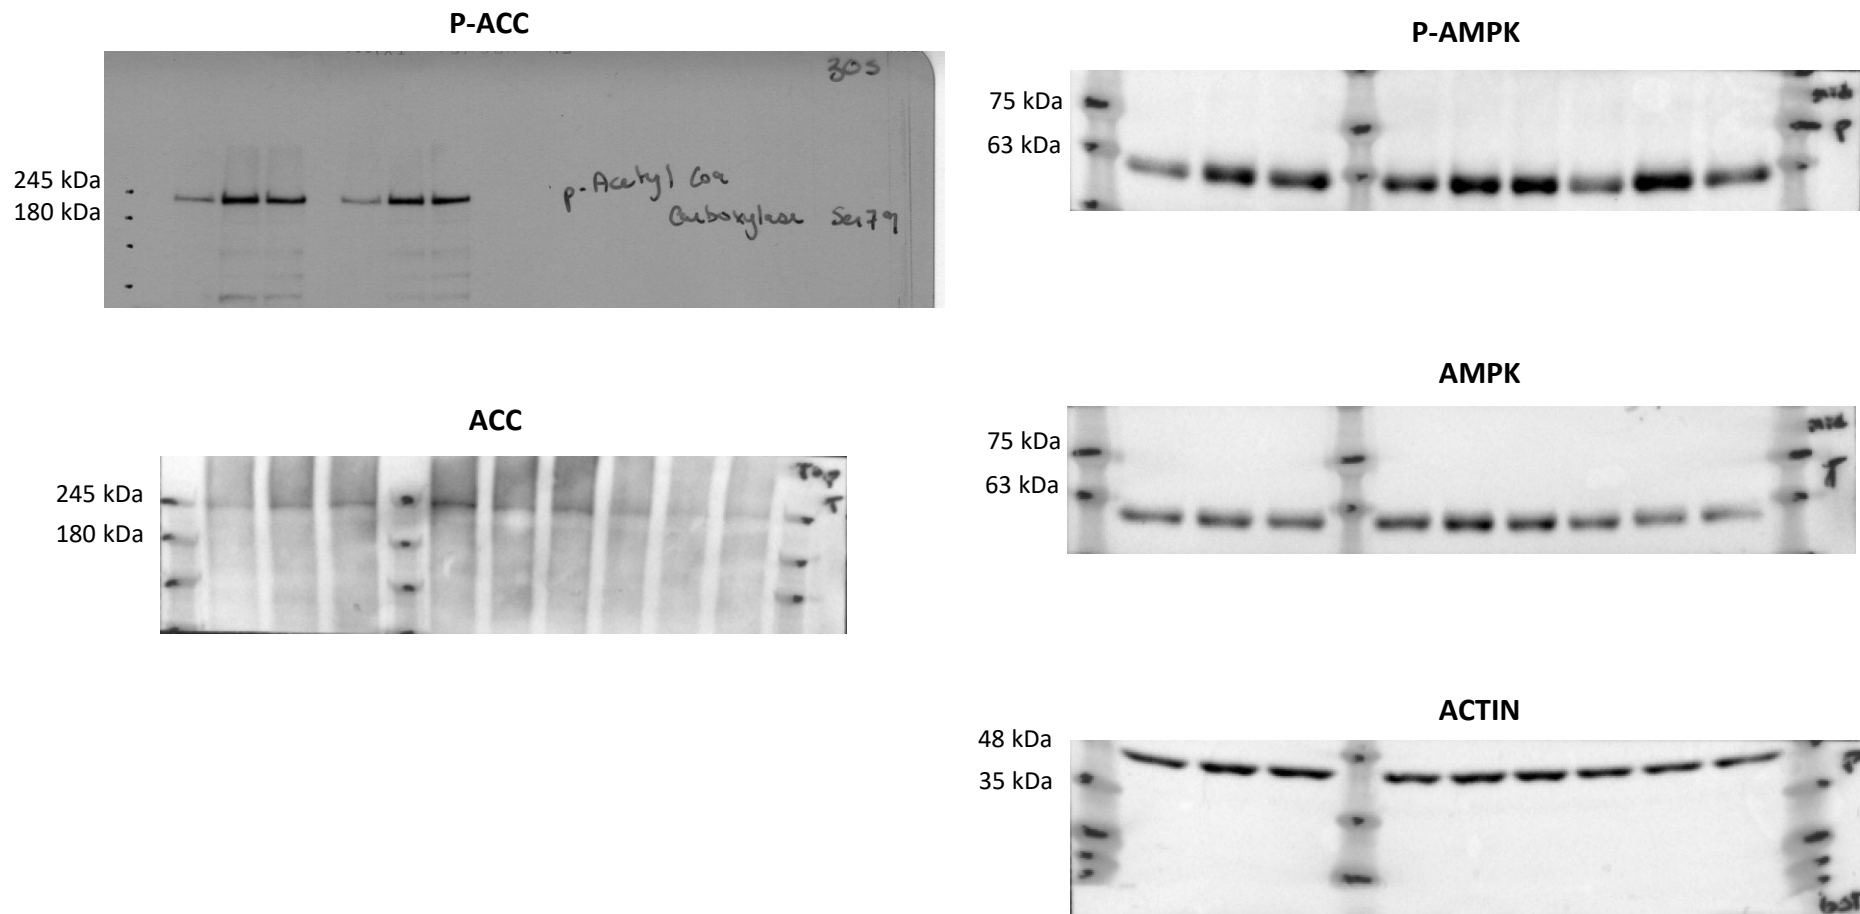

**Figure 1B, Source Data 2.** Original membranes corresponding to Figure 1B. Lanes 1–3 correspond to N = 1 for untreated (control) cells, metformin-treated cells, and biotin-functionalized biguanide-treated cells, respectively. Lanes 4–6 correspond to N = 2 under the same conditions. Lanes 7–9 for ACC, P-AMPK, AMPK, and ACTIN correspond to N = 3 under the same conditions. All experimental conditions are annotated on the corresponding membranes. Apparent molecular weight positions are manually annotated to indicate the size of the detected bands.
