# Supplementary material for: The Role of ATP Synthase Subunit e (ATP5I) in Mediating the Metabolic and Antiproliferative Effects of Biguanides
Source: eLife journal article supplement (doi:10.7554/elife.102680), 2024-12-13
Supplement: fig2-data1 [file Figure 2A_Source data 1.pdf › Figure 2 - Source data 1/Figure 2A_Source data 1.pdf]

**ATP5I**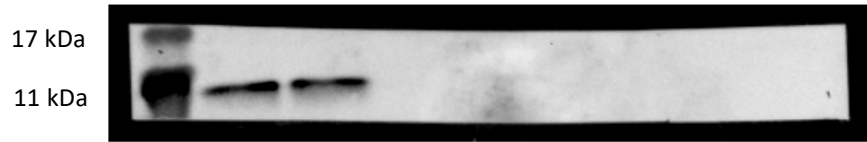**ATP5L**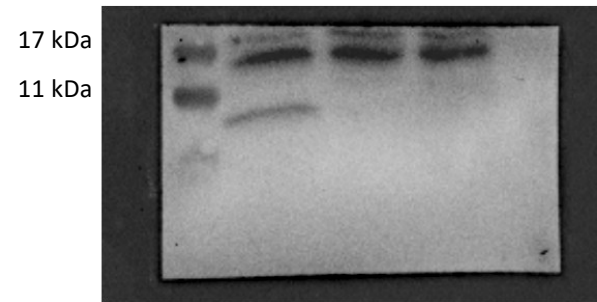**OXPHOS cocktail**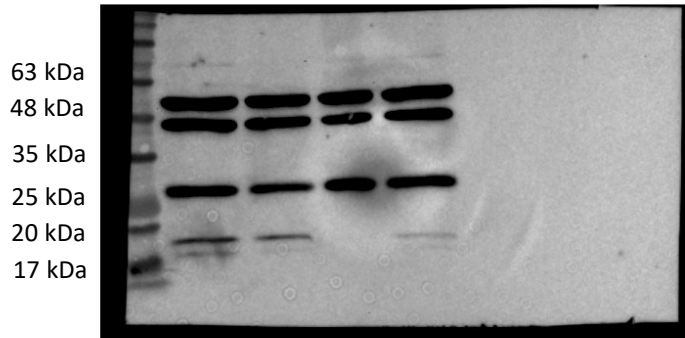**OSCP**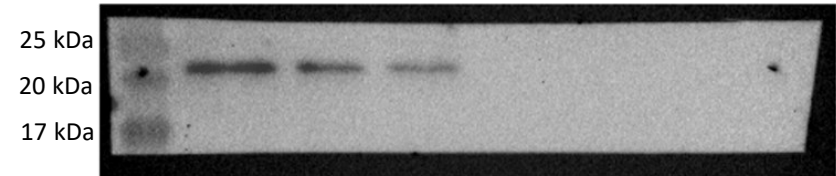**b-subunit**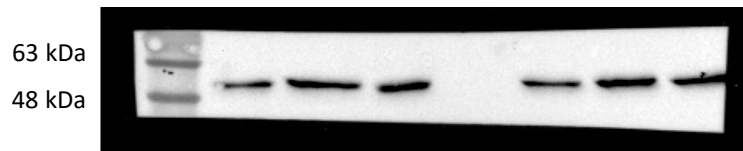**GAPDH**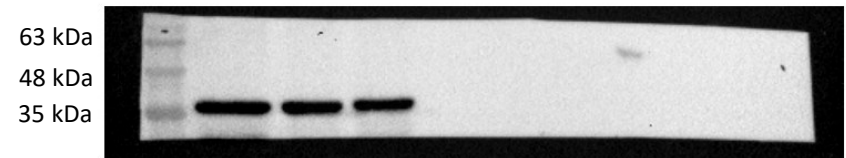

**Figure 2A, Source Data 1.** Original membranes corresponding to Figure 2A. For ATP5I and OXPHOS cocktail (originally from the preprint), lane 1 corresponds to non-infected cells, lane 2 to GFP control cells, lane 3 to ATP5I guide #1, and lane 4 to ATP5I guide #2. For ATP5L, OSCP, b subunit, and GAPDH, lane 1 corresponds to GFP control, lane 2 to ATP5I guide #1, and lane 3 to ATP5I guide #2. For the b subunit blot, lanes 4–6 correspond to the same conditions repeated as biological replicate N = 2. Apparent molecular weight positions are indicated using the annotated blue prestained protein marker.
