# Supplementary material for: The Role of ATP Synthase Subunit e (ATP5I) in Mediating the Metabolic and Antiproliferative Effects of Biguanides
Source: eLife journal article supplement (doi:10.7554/elife.102680), 2024-12-13
Supplement: fig2-figsupp1-data1 [file Figure 2_Figure supplement 1_Source data 1.pdf › Figure 2 - Figure supplement 1 - Source data 1/Figure 2_Figure supplement 1_Source data 1.pdf]

### OXPHOS cocktail

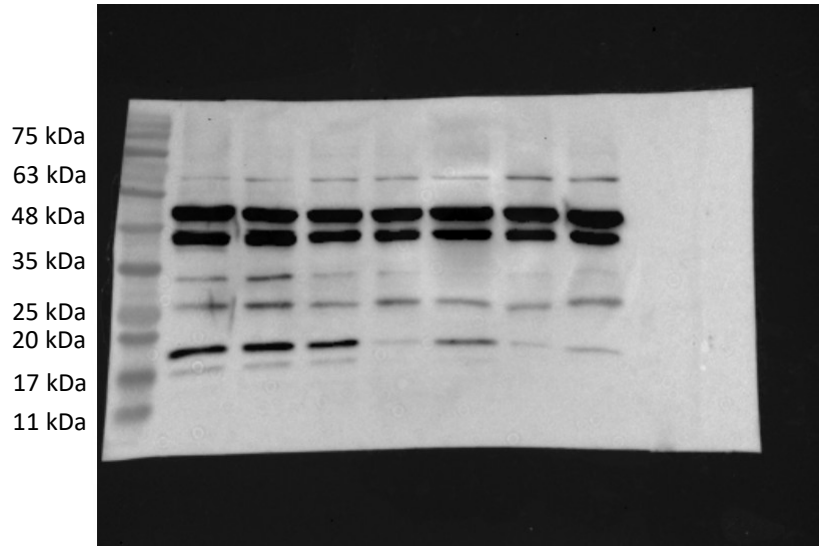

### GAPDH

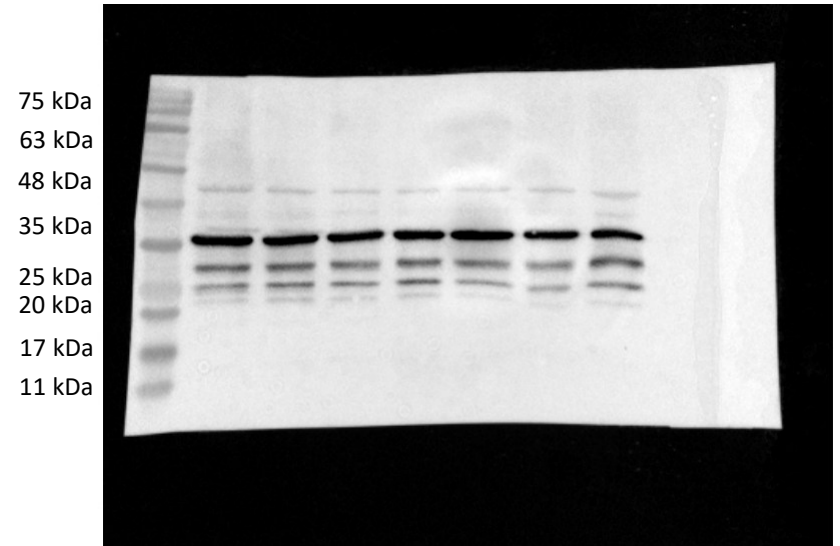

### ATP5I

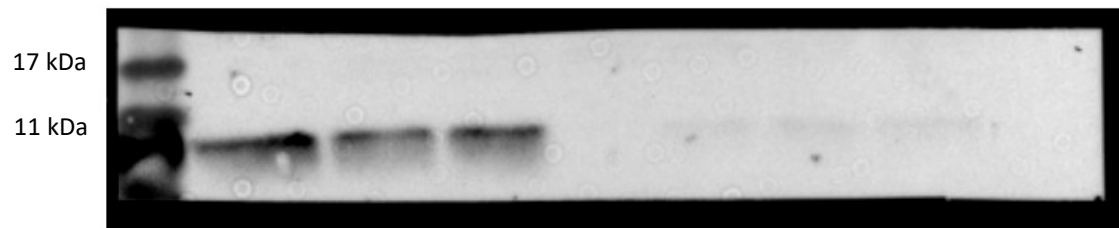

**Figure 2, Figure supplement 1, Source Data 1.** Original membranes corresponding to Figure 2, Figure supplement 1. Lane 1 corresponds to non-infected cells. Lanes 2–3 correspond to two clones of GFP control cells. Lanes 4–5 correspond to two clones of ATP5I guide #1 cells, and lanes 6–7 correspond to two clones of ATP5I guide #2 cells. Apparent molecular weight positions are indicated using the annotated blue prestained protein marker.
