# Supplementary material for: The Role of ATP Synthase Subunit e (ATP5I) in Mediating the Metabolic and Antiproliferative Effects of Biguanides
Source: eLife journal article supplement (doi:10.7554/elife.102680), 2024-12-13
Supplement: fig3-data1 [file Figure 3_Source data 1.pdf › Figure 3 - Source data 1/Figure 3_Source data 1.pdf]

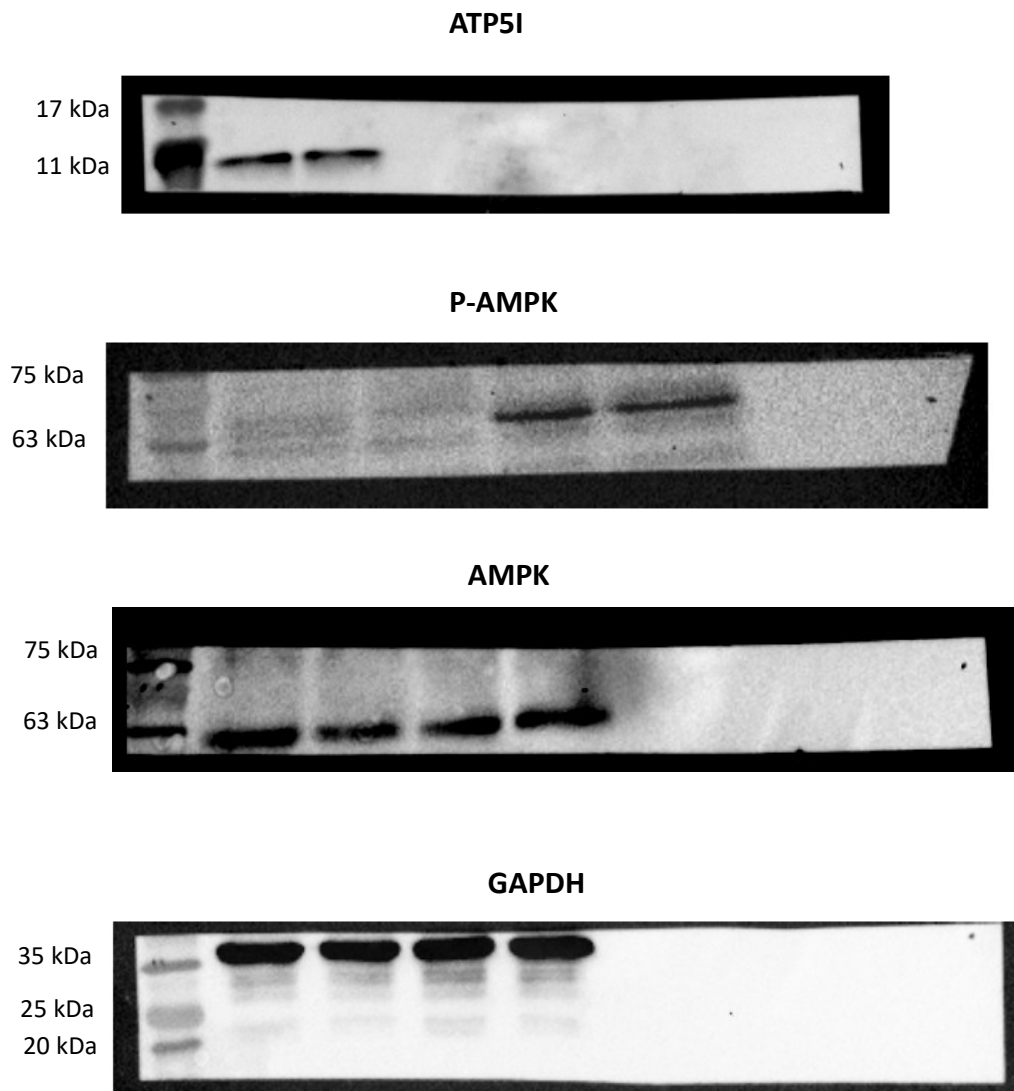

**Figure 3, Source Data 1.** Original membranes corresponding to Figure 3. Lane 1 corresponds to non-infected cells, lane 2 to GFP control cells, lane 3 to ATP5I guide #1, and lane 4 to ATP5I guide #2 respectively. Apparent molecular weight positions are indicated using the annotated blue prestained protein marker.
