# Supplementary material for: The Role of ATP Synthase Subunit e (ATP5I) in Mediating the Metabolic and Antiproliferative Effects of Biguanides
Source: eLife journal article supplement (doi:10.7554/elife.102680), 2024-12-13
Supplement: fig3-figsupp1-data1 [file Figure 3_Figure supplement 1_Source data 1.pdf › Figure 3 - Figure supplement 1 - Source data 1/Figure 3_Figure supplement 1_Source data 1.pdf]

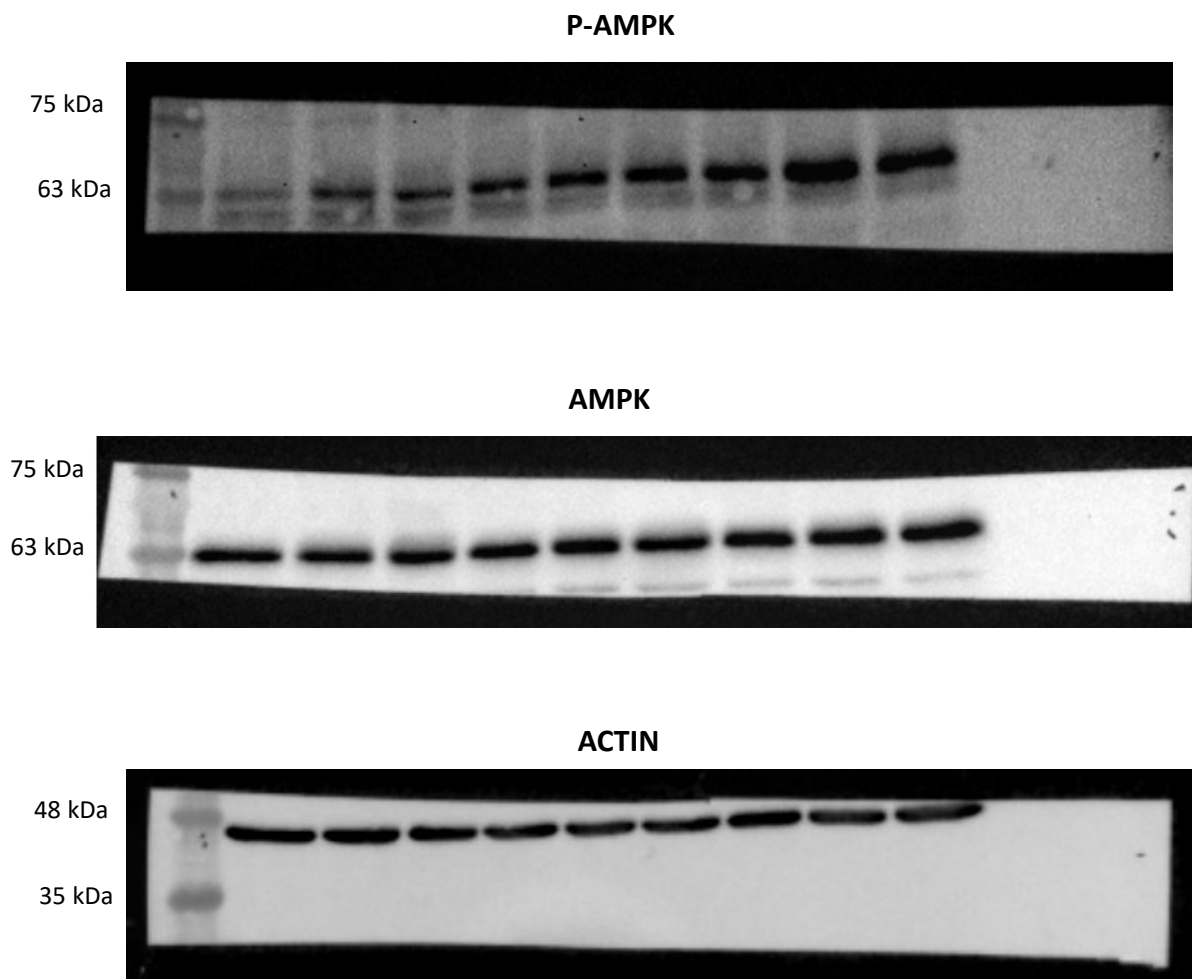

**Figure 3, Figure Supplement 1, Source Data 1.** Original membranes corresponding to Figure 3, Figure Supplement 1. Lanes 1–3 correspond to GFP control cells untreated, treated with 2.5 mM metformin, and treated with 5 mM metformin, respectively. Lanes 4–6 correspond to the same conditions for ATP5I guide #1 cells. Lanes 7–9 correspond to the same conditions for ATP5I guide #2 cells. Apparent molecular weight positions are indicated using the annotated blue prestained protein marker.
