# Supplementary material for: The Role of ATP Synthase Subunit e (ATP5I) in Mediating the Metabolic and Antiproliferative Effects of Biguanides
Source: eLife journal article supplement (doi:10.7554/elife.102680), 2024-12-13
Supplement: fig4-data1 [file Figure 4_Source data 1.pdf › Figure 4 - Source data 1/Figure 4_Source data 1.pdf]

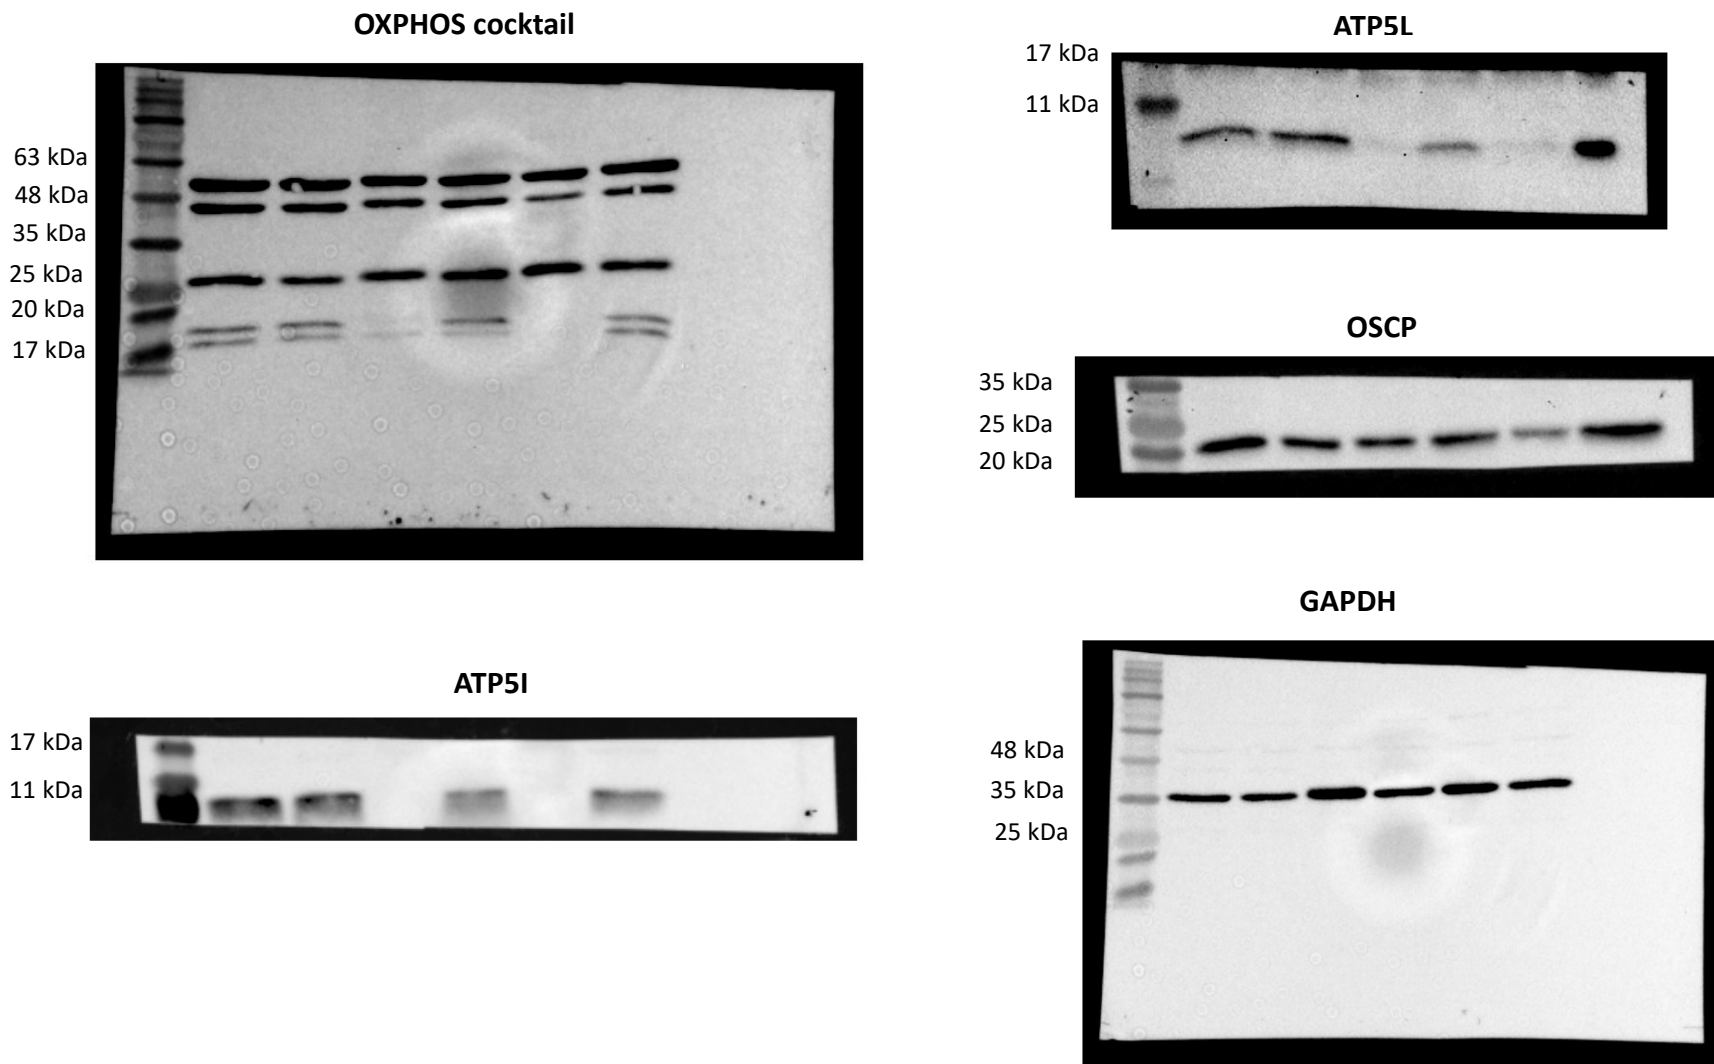

**Figure 4, Source Data 1.** Original membranes corresponding to Figure 4. Lanes 1–2 correspond to GFP control cells without or with exogenous ATP5I expression, respectively. Lanes 3–4 correspond to ATP5I guide #1 cells without or with exogenous ATP5I expression, respectively. Lanes 5–6 correspond to ATP5I guide #2 cells without or with exogenous ATP5I expression, respectively. Apparent molecular weight positions are indicated using the annotated blue prestained protein marker.
